# Supplementary material for: The Histone Demethylase KDM3B Promotes Osteo-/Odontogenic Differentiation, Cell Proliferation, and Migration Potential of Stem Cells from the Apical Papilla
Source: Stem Cells Int. 2020 Oct 7;2020:8881021. doi: 10.1155/2020/8881021 (PMC7563049; doi:10.1155/2020/8881021)
Supplement: Supplementary 3 — Table 2:The upregulated and downregulated pathways in KDM3B over-expressed SCAPs [file 8881021.f3.xlsx]

## Sheet: sheet
Supplementary Table 2.The upregulated and downregulated pathways in KDM3B over-expressed SCAPs
Path_id	Path_name	geneRatio	bgRatio	pvalue	FDR	enrichScore	style
hsa05160	Hepatitis C	10/48	135/5894	8.87455e-08	6.74466e-06	9.09568	up
hsa05200	Pathways in cancer	8/48	327/5894	0.00442875	0.122561	3.00408	up
hsa05222	Small cell lung cancer	4/48	85/5894	0.00483792	0.122561	5.77843	up
hsa04630	Jak-STAT signaling pathway	5/48	155/5894	0.00811687	0.154221	3.96102	up
hsa04610	Complement and coagulation cascades	3/48	69/5894	0.0182431	0.185302	5.33877	up
hsa05212	Pancreatic cancer	3/48	70/5894	0.0189527	0.185302	5.2625	up
hsa04622	RIG-I-like receptor signaling pathway	3/48	71/5894	0.0196776	0.185302	5.18838	up
hsa05218	Melanoma	3/48	71/5894	0.0196776	0.185302	5.18838	up
hsa05412	Arrhythmogenic right ventricular cardiomyopathy (ARVC)	3/48	74/5894	0.0219437	0.185302	4.97804	up
hsa05410	Hypertrophic cardiomyopathy (HCM)	3/48	83/5894	0.029567	0.197319	4.43825	up
hsa04512	ECM-receptor interaction	3/48	85/5894	0.0314288	0.197319	4.33382	up
hsa05340	Primary immunodeficiency	2/48	35/5894	0.0325811	0.197319	7.01667	up
hsa04640	Hematopoietic cell lineage	3/48	88/5894	0.0343352	0.197319	4.18608	up
hsa05414	Dilated cardiomyopathy	3/48	90/5894	0.0363483	0.197319	4.09306	up
hsa04620	Toll-like receptor signaling pathway	3/48	102/5894	0.0496742	0.251683	3.61152	up
hsa04512	ECM-receptor interaction	5/23	85/5894	1.52011e-05	0.000714452	15.0742	down
hsa04510	Focal adhesion	5/23	200/5894	0.00087397	0.0205383	6.40652	down
hsa04350	TGF-beta signaling pathway	3/23	85/5894	0.00416233	0.0652098	9.0445	down
hsa05143	African trypanosomiasis	2/23	35/5894	0.00801533	0.0941802	14.6435	down
hsa04514	Cell adhesion molecules (CAMs)	3/23	136/5894	0.0151822	0.123754	5.65281	down
hsa05144	Malaria	2/23	51/5894	0.0165387	0.123754	10.0494	down
hsa00330	Arginine and proline metabolism	2/23	54/5894	0.0184315	0.123754	9.49114	down
hsa00750	Vitamin B6 metabolism	1/23	6/5894	0.0231962	0.136277	42.7101	down
hsa05412	Arrhythmogenic right ventricular cardiomyopathy (ARVC)	2/23	74/5894	0.0331902	0.165551	6.92597	down
hsa05410	Hypertrophic cardiomyopathy (HCM)	2/23	83/5894	0.0409428	0.165551	6.17496	down
hsa05414	Dilated cardiomyopathy	2/23	90/5894	0.047402	0.165551	5.69469	down
hsa04810	Regulation of actin cytoskeleton	3/23	214/5894	0.0489634	0.165551	3.59244	down
hsa03010	Ribosome	2/23	92/5894	0.0493129	0.165551	5.57089	down
hsa05323	Rheumatoid arthritis	2/23	92/5894	0.0493129	0.165551	5.57089	down
