# Supplementary material for: The Histone Demethylase KDM3B Promotes Osteo-/Odontogenic Differentiation, Cell Proliferation, and Migration Potential of Stem Cells from the Apical Papilla
Source: Stem Cells Int. 2020 Oct 7;2020:8881021. doi: 10.1155/2020/8881021 (PMC7563049; doi:10.1155/2020/8881021)
Supplement: Supplementary 4 — Table 3:The significant pathways enriched by path-net in KDM3B over-expressed SCAPs [file 8881021.f4.xls]

## Sheet: SHEET
Supplementary Table 3. The significant pathways enriched by path-net in KDM3B over-expressed SCAPs
pathID	pathDescription	diffState	degree
hsa04350	TGF-beta signaling pathway	down	2
hsa04510	Focal adhesion	down	6
hsa04512	ECM-receptor interaction	up_down	4
hsa04514	Cell adhesion molecules (CAMs)	down	1
hsa04610	Complement and coagulation cascades	up	2
hsa04620	Toll-like receptor signaling pathway	up	2
hsa04630	Jak-STAT signaling pathway	up	3
hsa04640	Hematopoietic cell lineage	up	1
hsa04810	Regulation of actin cytoskeleton	down	2
hsa05200	Pathways in cancer	up	7
hsa05212	Pancreatic cancer	up	3
hsa05218	Melanoma	up	1
hsa05222	Small cell lung cancer	up	3
hsa05340	Primary immunodeficiency	up	1
