# Supplementary material for: The Histone Demethylase KDM3B Promotes Osteo-/Odontogenic Differentiation, Cell Proliferation, and Migration Potential of Stem Cells from the Apical Papilla
Source: Stem Cells Int. 2020 Oct 7;2020:8881021. doi: 10.1155/2020/8881021 (PMC7563049; doi:10.1155/2020/8881021)
Supplement: Supplementary 5 — Table 4:The 12 core genes enriched by signal-net in KDM3B over-expressed SCAPs [file 8881021.f5.xls]

## Sheet: sheet
Supplementary Table 4. The 12 core genes enriched by signal-net in KDM3B over-expressed SCAPs
Gene symbol	Description	betweenness centrality	degree	style
CCND1	cyclin D1	0.0051907	1	up
CLDN1	claudin 1	0.00318213	1	up
CLDN11	claudin 11	0.00207628	1	up
DDX58	DEAD (Asp-Glu-Ala-Asp) box polypeptide 58	0.00160235	1	up
FGF5	fibroblast growth factor 5	0.00153464	1	up
ISG15	ISG15 ubiquitin-like modifier	0.00117355	1	up
MET	MET proto-oncogene, receptor tyrosine kinase	0.000902731	1	up
MYD88	myeloid differentiation primary response 88	0.000785376	1	up
PLAT	plasminogen activator, tissue	0.000586775	1	up
PLAU	plasminogen activator, urokinase	0.000451365	1	up
SERPINE1	serpin peptidase inhibitor, clade E (nexin, plasminogen activator inhibitor type 1), member 1	0.000270819	2	up
STAT1	signal transducer and activator of transcription 1	0.000198601	2	up
Gene_Symbol"	Degree	Betweenness	Betweenness_normalized
CCND1	1	0	NA
CLDN1	1	0	NA
CLDN11	1	0	NA
DDX58	1	0	NA
FGF5	1	0	NA
ISG15	1	0	NA
MET	1	0	NA
MYD88	1	0	NA
PLAT	1	0	NA
PLAU	1	0	NA
SERPINE1	2	0	NA
STAT1	2	0	NA
